# Supplementary material for: Clinicopathological Significances of Tumor–Stroma Ratio (TSR) in Colorectal Cancers: Prognostic Implication of TSR Compared to Hypoxia-Inducible Factor-1α Expression and Microvessel Density
Source: MDPI journal article supplement (doi:10.3390/curroncol28020125), 2021-03-22
Supplement: s1 [file s1]

# Clinicopathological Significances of Tumor–Stroma Ratio (TSR) in Colorectal Cancers: Prognostic Implication of TSR Compared to Hypoxia-Inducible Factor-1 $\alpha$ Expression and Microvessel Density

Guhyun Kang, Jung-Soo Pyo, Nae-Yu Kim and Dong-Wook Kang

**Table S1.** The correlation between high microvessel density and overall and recurrence-free survivals in various subgroups according to the tumor stroma ratio.

| Subgroups   | Overall Survival<br>( <i>p</i> -Value) | Recurrence-Free Survival<br>( <i>p</i> -Value) |
|-------------|----------------------------------------|------------------------------------------------|
| ≥stroma 30% | 0.132                                  | 0.297                                          |
| <stroma 30% | 0.458                                  | 0.458                                          |
| ≥stroma 50% | 0.210                                  | 0.339                                          |
| <stroma 50% | 0.866                                  | 0.820                                          |
| ≥stroma 70% | <b>0.004</b>                           | <b>0.005</b>                                   |
| <stroma 70% | 0.053                                  | <b>0.042</b>                                   |

*p* < 0.05 are highlighted in bold.

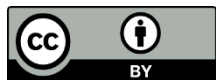

© 2021 by the authors. Licensee MDPI, Basel, Switzerland. This article is an open access article distributed under the terms and conditions of the Creative Commons Attribution (CC BY) license (<http://creativecommons.org/licenses/by/4.0/>).
